# Supplementary material
Source: Research Square preprint supplement (doi:10.21203/rs.3.rs-9246107/v1)
Supplement: Supplementary file 2 [file 790d9b958be20a206dbfeeb4.docx]

**Mapping the Global Evidence on International Public Sector Accounting Standards Adoption in Low- and Middle-Income Countries:** **A Scoping Review and Evidence Gap Map**

***Supplementary File S2: Institutional Database Search Strings***

## S2.1 Overview

This file provides the complete Boolean search strings deployed in the supplementary institutional database searches of Scopus and Web of Science (WoS). These searches were conducted to complement the primary programmatic searches described in Supplementary File S1, and to capture high-quality publications indexed in subscription-only databases that may not be fully represented in open-access repositories such as OpenAlex and Semantic Scholar.

Searches were conducted across nine thematic domains derived from the review protocol, with geographic cross-referencing applied to sub-Saharan Africa, Asia, the Middle East and North Africa (MENA), Latin America, and global/comparative study designs. All searches were limited to publications from 1 January 2010 to 31 December 2026.

| **Databases searched** | Scopus (Elsevier); Web of Science (Clarivate) — Core Collection |
| --- | --- |
| **Date of search** | Institutional access; searches conducted during the review period |
| **Date range applied** | 1 January 2010 – 31 December 2026 |
| **Languages** | English (primary); French and Portuguese strings also applied |
| **Search fields** | Title (TI), Abstract (AB), Keywords (KW/DE), Author Keywords (AK) |
| **Deduplication** | DOI-matched against primary OpenAlex/Semantic Scholar results; duplicates removed |
| **Records retrieved** | Supplementary (counts merged into overall 3,416 record pool) |

## S2.2 Core IPSAS Adoption and Implementation Strings

The following strings target the primary construct of IPSAS adoption, implementation, compliance, and accrual accounting reform in the public sector.

### S2.2.1 Scopus

TITLE-ABS-KEY ( "IPSAS" OR "International Public Sector Accounting Standards" OR "accrual accounting" AND "public sector" ) AND PUBYEAR > 2009 AND PUBYEAR < 2027

TITLE-ABS-KEY ( ( "IPSAS adoption" OR "IPSAS implementation" OR "IPSAS compliance" OR "IPSAS reform" ) AND ( "government" OR "public sector" OR "municipality" OR "state-owned" ) ) AND PUBYEAR > 2009

TITLE-ABS-KEY ( "accrual basis accounting" AND ( "public financial management" OR "government reporting" OR "fiscal transparency" ) ) AND PUBYEAR > 2009

### S2.2.2 Web of Science (Core Collection)

TS=("IPSAS" OR "International Public Sector Accounting Standards") AND PY=2010-2026

TS=("accrual accounting" AND "public sector") AND TS=("adoption" OR "implementation" OR "reform" OR "compliance") AND PY=2010-2026

TS=("government financial reporting" OR "public sector financial statements") AND TS=("quality" OR "comparability" OR "transparency") AND PY=2010-2026

*Note. Strings S2.2.1 and S2.2.2 form the primary IPSAS-specific retrieval block. All subsequent thematic strings (S2.3–S2.9) were run in addition to, and cross-referenced with, this core block.*

## S2.3 Accountability and Fiscal Transparency Strings

### S2.3.1 Scopus

TITLE-ABS-KEY ( ( "fiscal transparency" OR "budget transparency" OR "financial accountability" ) AND ( "public sector" OR "government" OR "municipality" ) AND ( "IPSAS" OR "accrual" OR "public financial management" ) ) AND PUBYEAR > 2009

TITLE-ABS-KEY ( ( "accountability" OR "transparency" ) AND ( "IPSAS" OR "public sector accounting" OR "government financial reporting" ) AND ( "Africa" OR "Asia" OR "developing countr*" OR "LMIC*" ) ) AND PUBYEAR > 2009

### S2.3.2 Web of Science

TS=("fiscal transparency" OR "budget transparency" OR "public accountability") AND TS=("IPSAS" OR "accrual accounting" OR "public financial management") AND PY=2010-2026

TS=("transparency index" OR "Open Budget Index" OR "PEFA") AND TS=("accounting reform" OR "IPSAS" OR "government reporting") AND PY=2010-2026

## S2.4 Governance Quality and Anti-Corruption Strings

### S2.4.1 Scopus

TITLE-ABS-KEY ( ( "governance quality" OR "anti-corruption" OR "corruption perception" OR "public governance" ) AND ( "IPSAS" OR "accrual accounting" OR "public sector accounting" ) ) AND PUBYEAR > 2009

TITLE-ABS-KEY ( ( "corruption" OR "bribery" OR "public integrity" ) AND ( "financial reporting" OR "public accounting" OR "IPSAS" OR "audit" ) AND ( "government" OR "public sector" ) ) AND PUBYEAR > 2009

### S2.4.2 Web of Science

TS=("governance" OR "anti-corruption") AND TS=("IPSAS" OR "public sector accounting" OR "government financial management") AND PY=2010-2026

TS=("institutional quality" OR "rule of law" OR "Worldwide Governance Indicators") AND TS=("accounting reform" OR "IPSAS" OR "fiscal transparency") AND PY=2010-2026

## S2.5 Challenges and Barriers to IPSAS Implementation

### S2.5.1 Scopus

TITLE-ABS-KEY ( ( "barrier*" OR "challenge*" OR "obstacle*" OR "constraint*" OR "impediment*" ) AND ( "IPSAS" OR "public sector accounting" OR "accrual reform" ) AND ( "implement*" OR "adopt*" OR "compli*" ) ) AND PUBYEAR > 2009

TITLE-ABS-KEY ( ( "capacity" OR "training" OR "professional development" OR "human resource*" ) AND ( "IPSAS" OR "public sector accounting" ) AND ( "Africa" OR "Asia" OR "developing" OR "LMIC*" ) ) AND PUBYEAR > 2009

### S2.5.2 Web of Science

TS=("barriers" OR "challenges" OR "obstacles") AND TS=("IPSAS" OR "accrual accounting" OR "public sector accounting reform") AND PY=2010-2026

TS=("implementation fidelity" OR "ceremonial compliance" OR "isomorphism") AND TS=("public sector" OR "government accounting" OR "IPSAS") AND PY=2010-2026

## S2.6 Financial Reporting Quality Strings

### S2.6.1 Scopus

TITLE-ABS-KEY ( ( "financial reporting quality" OR "reporting comparability" OR "reporting completeness" OR "earnings quality" ) AND ( "public sector" OR "government" OR "IPSAS" OR "accrual" ) ) AND PUBYEAR > 2009

TITLE-ABS-KEY ( ( "GIFMIS" OR "IFMIS" OR "ERP" OR "enterprise resource planning" ) AND ( "public sector" OR "government accounting" OR "IPSAS" ) ) AND PUBYEAR > 2009

### S2.6.2 Web of Science

TS=("financial reporting quality" OR "public sector financial statements") AND TS=("IPSAS" OR "accrual basis" OR "government accounting") AND PY=2010-2026

TS=("integrated financial management" OR "GIFMIS" OR "IFMIS") AND TS=("accounting" OR "reporting" OR "transparency") AND PY=2010-2026

## S2.7 Public Financial Management Reform Strings

### S2.7.1 Scopus

TITLE-ABS-KEY ( ( "public financial management" OR "PFM reform" OR "budget reform" OR "fiscal reform" ) AND ( "IPSAS" OR "accrual accounting" OR "accounting reform" ) ) AND PUBYEAR > 2009

TITLE-ABS-KEY ( ( "PEFA" OR "Public Expenditure and Financial Accountability" OR "IMF fiscal" OR "World Bank PFM" ) AND ( "accounting" OR "reporting" OR "IPSAS" ) ) AND PUBYEAR > 2009

### S2.7.2 Web of Science

TS=("public financial management reform" OR "PFM") AND TS=("IPSAS" OR "accrual accounting" OR "government financial reporting") AND PY=2010-2026

## S2.8 Africa and Low- and Middle-Income Country Context Strings

### S2.8.1 Scopus

TITLE-ABS-KEY ( ( "sub-Saharan Africa" OR "West Africa" OR "East Africa" OR "Southern Africa" OR "Francophone Africa" OR "Lusophone Africa" ) AND ( "IPSAS" OR "public sector accounting" OR "accrual" OR "government financial reporting" ) ) AND PUBYEAR > 2009

TITLE-ABS-KEY ( ( "Ghana" OR "Nigeria" OR "Kenya" OR "Tanzania" OR "Uganda" OR "Zambia" OR "South Africa" OR "Senegal" OR "Mali" OR "Mozambique" ) AND ( "IPSAS" OR "public sector accounting" OR "government accounting" OR "PFM reform" ) ) AND PUBYEAR > 2009

TITLE-ABS-KEY ( ( "developing countr*" OR "emerging econom*" OR "low-income countr*" OR "middle-income countr*" OR "LMIC*" ) AND ( "IPSAS" OR "accrual accounting" OR "public financial management" ) ) AND PUBYEAR > 2009

### S2.8.2 Web of Science

TS=("sub-Saharan Africa" OR "developing countries" OR "LMICs") AND TS=("IPSAS" OR "public sector accounting" OR "government financial management") AND PY=2010-2026

TS=("Ghana" OR "Nigeria" OR "Kenya" OR "Tanzania" OR "Zambia" OR "South Africa") AND TS=("IPSAS" OR "accrual accounting" OR "public financial management") AND PY=2010-2026

## S2.9 Technology and GIFMIS Integration Strings

### S2.9.1 Scopus

TITLE-ABS-KEY ( ( "GIFMIS" OR "IFMIS" OR "integrated financial management information system" OR "ERP" OR "enterprise resource planning" ) AND ( "public sector" OR "government" OR "IPSAS" OR "accrual accounting" ) ) AND PUBYEAR > 2009

TITLE-ABS-KEY ( ( "e-government" OR "digital government" OR "ICT" OR "information technology" ) AND ( "public financial management" OR "government accounting" OR "fiscal transparency" OR "IPSAS" ) ) AND PUBYEAR > 2009

### S2.9.2 Web of Science

TS=("GIFMIS" OR "integrated financial management" OR "ERP" OR "government information system") AND TS=("public sector accounting" OR "IPSAS" OR "accrual") AND PY=2010-2026

**S2.10 French and Portuguese Language Strings**

The following strings were applied in Scopus using the LANGUAGE() filter to retrieve publications not captured by English-only queries. These contributed 7 additional records to the final dataset not identified through the primary English search.

### S2.10.1 French (Scopus)

TITLE-ABS-KEY ( "IPSAS" OR "normes comptables internationales" OR "comptabilité publique" OR "gestion des finances publiques" OR "transparence fiscale" ) AND LANGUAGE ( french ) AND PUBYEAR > 2009

TITLE-ABS-KEY ( ( "Afrique francophone" OR "Sénégal" OR "Mali" OR "Côte d'Ivoire" OR "Burkina Faso" OR "SYSCOHADA" OR "SYSCOA" ) AND ( "IPSAS" OR "comptabilité publique" OR "réforme financière" ) ) AND PUBYEAR > 2009

### S2.10.2 Portuguese (Scopus)

TITLE-ABS-KEY ( "IPSAS" OR "NICSP" OR "normas internacionais de contabilidade" OR "setor público" OR "contabilidade governamental" ) AND LANGUAGE ( portuguese ) AND PUBYEAR > 2009

TITLE-ABS-KEY ( ( "Brasil" OR "Angola" OR "Moçambique" OR "Portugal" ) AND ( "IPSAS" OR "NICSP" OR "contabilidade pública" OR "gestão financeira" ) ) AND PUBYEAR > 2009

**S2.11 Summary of Institutional Search Results**

The table below provides the record counts retrieved from each institutional search string group. All retrieved records were merged with the primary open-access database results and deduplicated using DOI matching and normalised title comparison prior to relevance screening.

**Table S2. Institutional Search Record Counts by Thematic Block**

| **Block** | **Thematic Focus** | **Scopus (n)** | **WoS (*n*)** | **After Dedup (*n*)** |
| --- | --- | --- | --- | --- |
| S2.2 | IPSAS Adoption & Implementation | Supplementary | Supplementary | Merged |
| S2.3 | Accountability & Fiscal Transparency | Supplementary | Supplementary | Merged |
| S2.4 | Governance & Anti-Corruption | Supplementary | Supplementary | Merged |
| S2.5 | Challenges & Barriers | Supplementary | Supplementary | Merged |
| S2.6 | Financial Reporting Quality | Supplementary | Supplementary | Merged |
| S2.7 | PFM Reforms | Supplementary | Supplementary | Merged |
| S2.8 | Africa / LMICs Context | Supplementary | Supplementary | Merged |
| S2.9 | Technology & GIFMIS | Supplementary | Supplementary | Merged |
| S2.10 | French & Portuguese Language | Supplementary | — | 7 unique |

*Note. Record counts from Scopus and WoS institutional searches are reported as 'Supplementary' because institutional access varied across the review period and exact record counts from subscription databases are not publicly reproducible. All retrieved records were merged into the overall 3,416-record pool prior to deduplication and relevance screening. The 7 unique French/Portuguese-language records represent contributions not captured by any other database.*

## S2.12 Notes on Search String Construction

All Boolean strings were constructed following the principles of exhaustive sensitivity while maintaining reasonable precision, consistent with best practice for systematic and scoping review searches (Lefebvre et al., 2022; Tricco et al., 2018).

1. Truncation (*) was applied to capture morphological variants (e.g., adopt*, implement*, countr*).
2. Phrase searching was used for multi-word concepts (e.g., "public financial management", "accrual basis accounting").
3. Boolean operators AND/OR were used to combine thematic and geographic/contextual terms.
4. Date filters (PUBYEAR > 2009 in Scopus; PY=2010-2026 in WoS) were applied to all strings.
5. Field codes: Scopus used TITLE-ABS-KEY(); WoS used TS= (Topic) which searches title, abstract, keywords, and keywords-plus.
6. Strings were pilot-tested against known relevant publications before full deployment to validate sensitivity.

## References

Lefebvre, C., Glanville, J., Briscoe, S., Littlewood, A., Marshall, C., Metzendorf, M.-I., … Wieland, L. S. (2022). Chapter 4: Searching for and selecting studies. In J. P. T. Higgins et al. (Eds.), Cochrane Handbook for Systematic Reviews of Interventions (Version 6.3). Cochrane. [www.training.cochrane.org/handbook](http://www.training.cochrane.org/handbook)

Tricco, A. C., Lillie, E., Zarin, W., et al. (2018). PRISMA Extension for Scoping Reviews (PRISMA-ScR): Checklist and explanation. Annals of Internal Medicine, 169(7), 467–473. <https://doi.org/10.7326/M18-0850>

*— End of Supplementary File S2 —*
